# Supplementary material for: Sortilin gates neurotensin and BDNF signaling to control peripheral neuropathic pain
Source: PubMed Central journal article supplement — Sci Adv. 2019 Jun 19;5(6):eaav9946. doi: 10.1126/sciadv.aav9946 (PMC6584543; doi:10.1126/sciadv.aav9946), 2019-06-19
Supplement: aav9946_SM.pdf [file aav9946_SM.pdf]

## Supplementary Materials for

### **Sortilin gates neurotensin and BDNF signaling to control peripheral neuropathic pain**

Mette Richner, Lone T. Pallesen, Maj Ulrichsen, Ebbe T. Poulsen, Thomas H. Holm, Hande Login, Annie Castonguay, Louis-Etienne Lorenzo, Nádia P. Gonçalves, Olav M. Andersen, Karin Lykke-Hartmann, Jan J. Enghild, Lars C. B. Rønn, Ibrahim J. Malik, Yves De Koninck, Ole J. Bjerrum, Christian B. Vægter\*, Anders Nykjær

\*Corresponding author. Email: cv@biomed.au.dk

Published 19 June 2019, *Sci. Adv.* **5**, eaav9946 (2019)

DOI: 10.1126/sciadv.aav9946

#### **This PDF file includes:**

- Fig. S1. Injury-induced microglia reactivity in WT and *Sort1*<sup>-/-</sup> lumbar spinal cord.
- Fig. S2. Neurochemical markers remain intact in sortilin-deficient mice.
- Fig. S3. Direct KCC2 inhibition induces pain hypersensitivity.
- Fig. S4. Subcellular localization of TrkB is unchanged in SDH of sortilin-deficient mice.
- Fig. S5. mRNA and protein levels of neurotensin and NTSR2 are unchanged in sortilin-deficient mice.
- Fig. S6. Sortilin allows direct manipulation of the pain response to neuronal injury.
- Fig. S7. *Hum-sortilin-KI* mouse model.

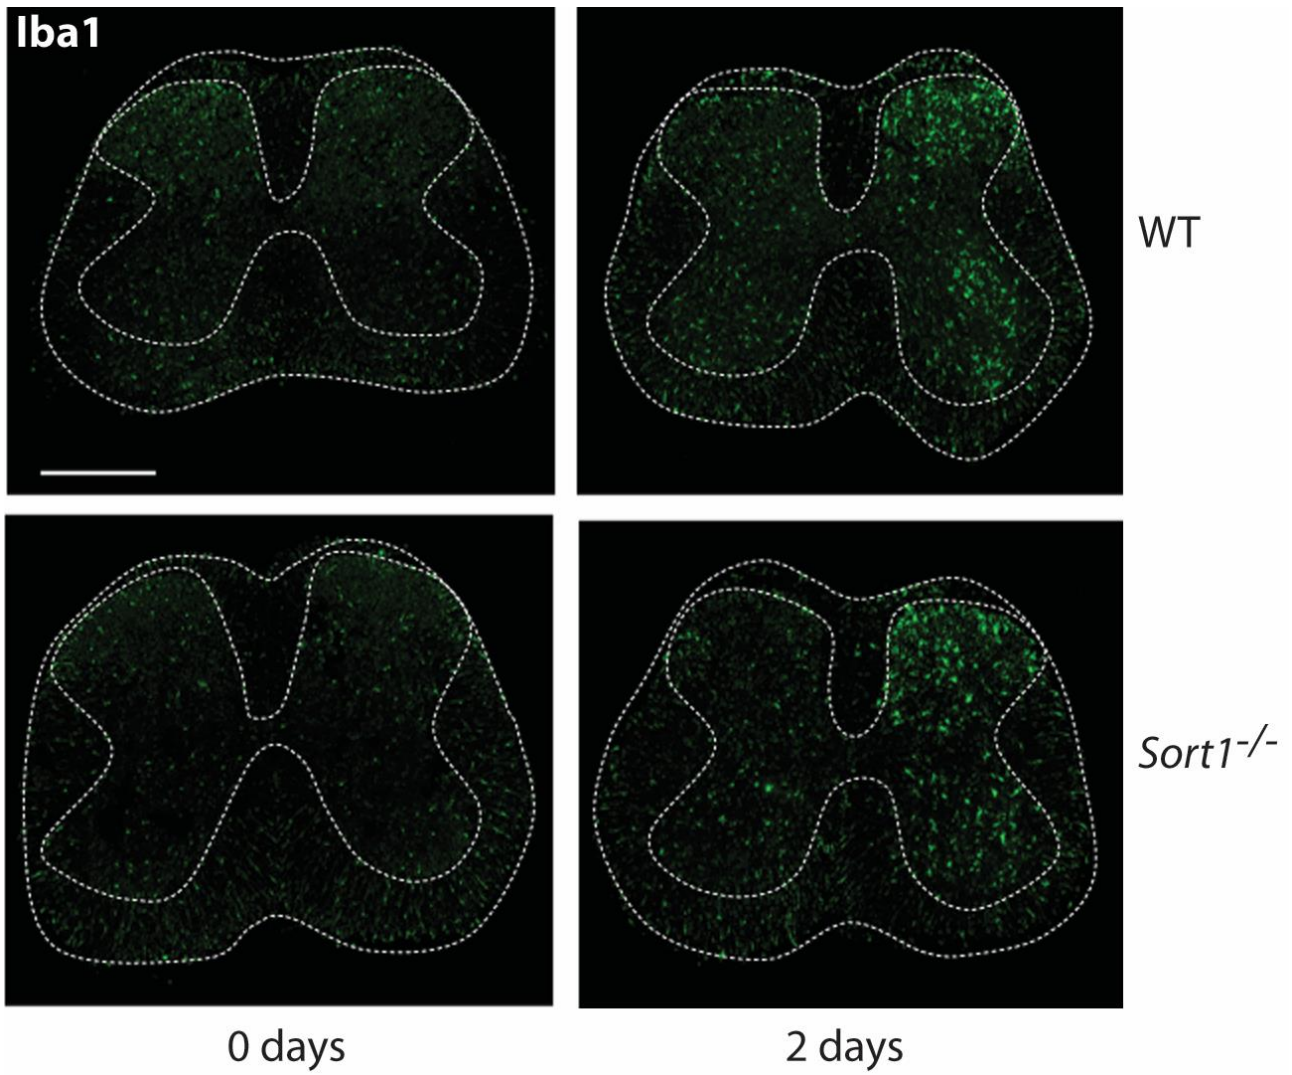

**Fig. S1. Injury-induced microglia reactivity in WT and *Sort1*<sup>-/-</sup> lumbar spinal cord.** Representative images of immunofluorescence labelling of Iba1 (green, microglia marker) in spinal L3-L5 sections of WT and *Sort1*<sup>-/-</sup> mice 0 and 2 days post SNI (injury on right side); scale bar = 500  $\mu$ m, n = 3.

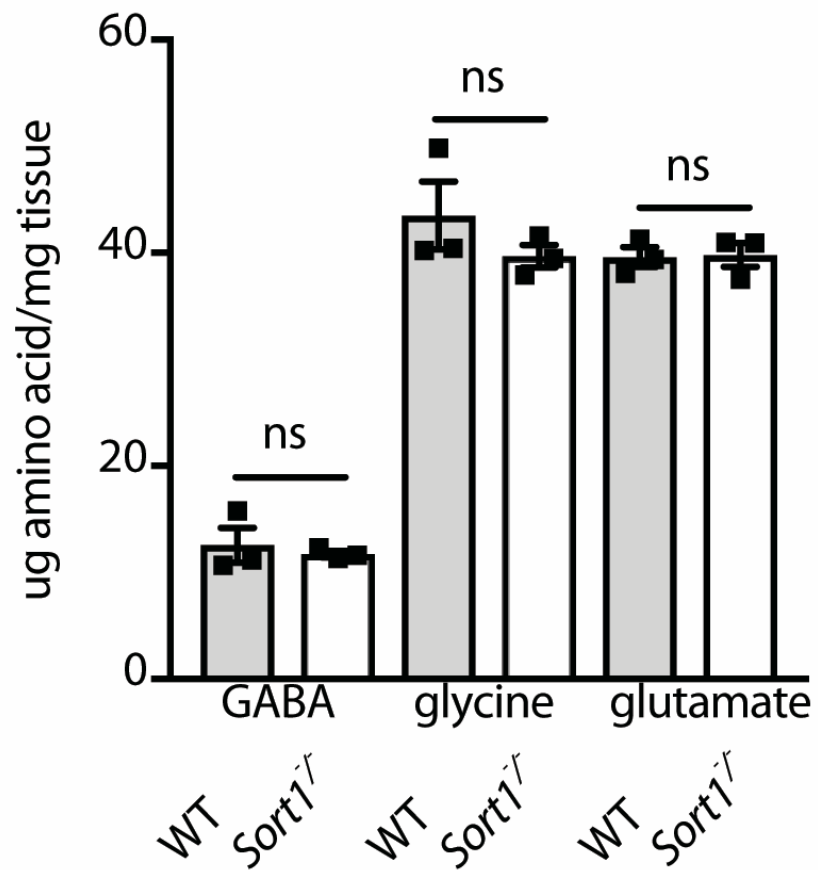

**Fig. S2. Neurochemical markers remain intact in sortilin-deficient mice.** GABA, glycine and glutamate in spinal L3-L5 sections of naïve WT and *Sort1*<sup>-/-</sup> mice (n = 3, unpaired t-test, ns = not significant, means ± SEM).

**A**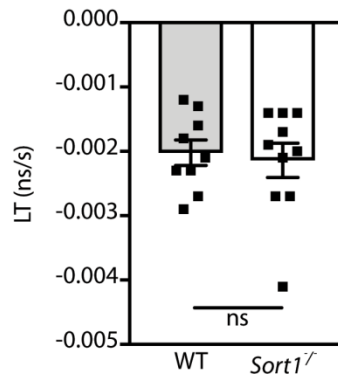**B**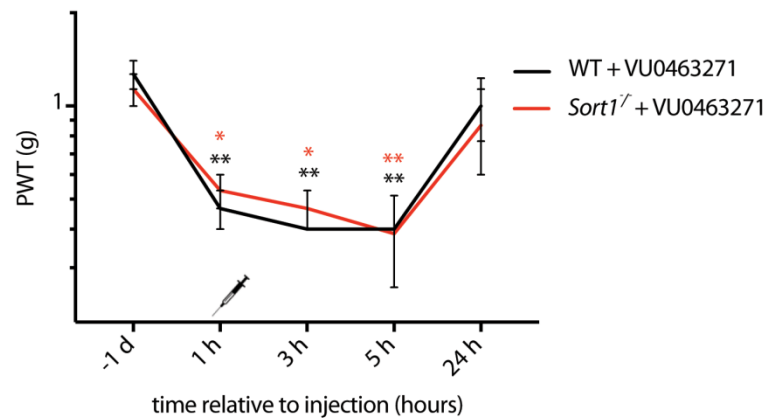

**Fig. S3. Direct KCC2 inhibition induces pain hypersensitivity.** (A) Measurements of KCC2 activity in reverse mode by  $K^+$ -driven uptake of  $Cl^-$  in superficial dorsal horn neurons of lumbar spinal cord, as lifetime (LT) change in nanoseconds per second (ns/s). 56-60 cells in 9-10 lumbar spinal cord slices from 4 animals were analyzed for each genotype ( $n = 9-10$ , t-test, ns = not significant, means  $\pm$  SEM). (B) PWT to tactile stimuli of naïve WT and *Sort1*<sup>-/-</sup> mice with i.t. injection of VU0463271 (\*  $P < 0.03$ , \*\*  $P < 0.007$  versus -1 d of the same mouse,  $n = 3$ , RM two-way ANOVA with post hoc Sidak's test ( $F(1,4) = 0.1266$ ,  $P = 0.7400$ ), means  $\pm$  SEM).

**A**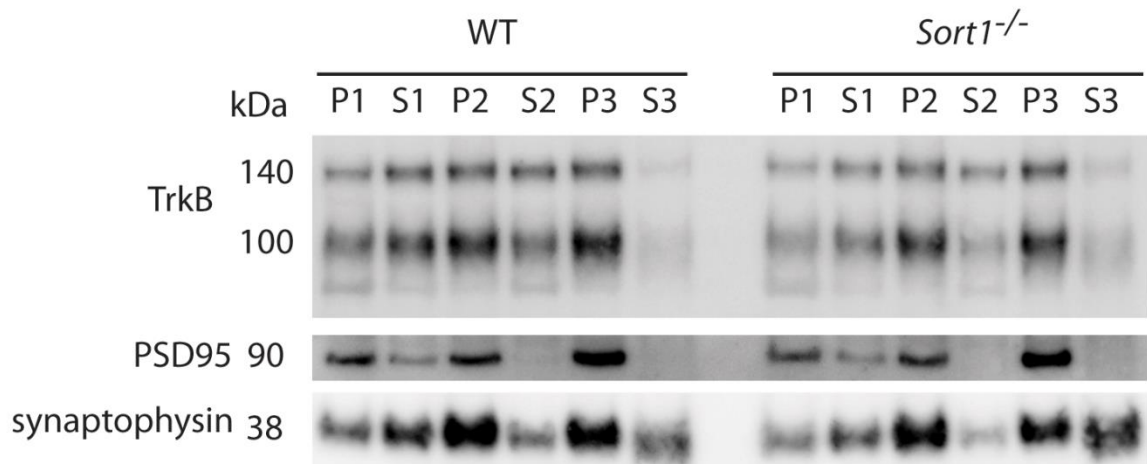**B**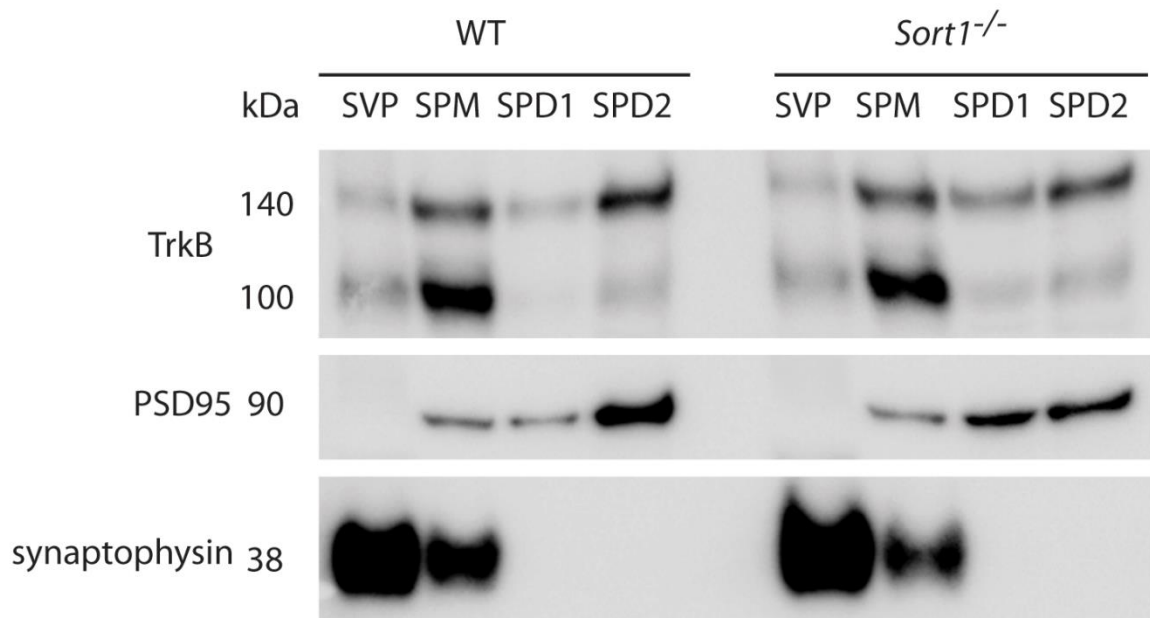

**Fig. S4. Subcellular localization of TrkB is unchanged in SDH of sortilin-deficient mice.** WB of subcellular fractionation of 8 pooled SDH of spinal L3-L5 from naïve WT and *Sort1*<sup>-/-</sup> mice (A) TrkB, PSD95 and synaptophysin in fractions P1 to S3, n = 1. (B) TrkB, PSD95 and synaptophysin in fractions SVP to SPD2.

**A**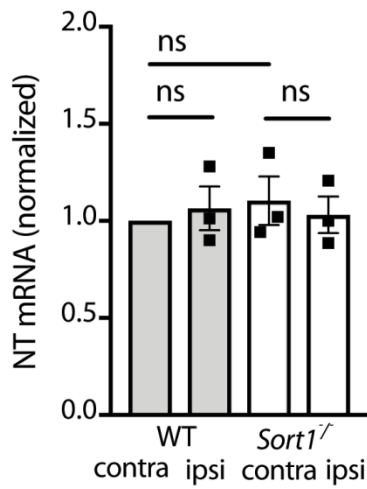**B**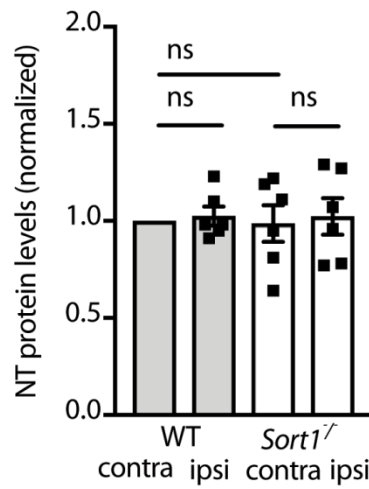**C**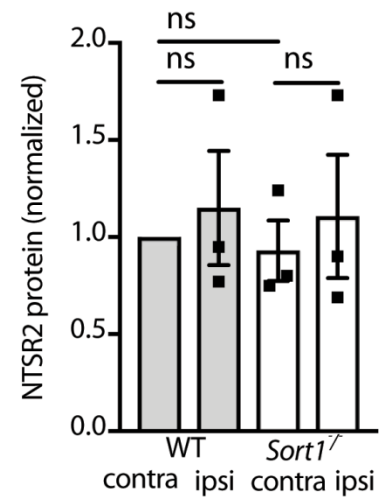

**Fig. S5. mRNA and protein levels of neurotensin and NTSR2 are unchanged in sortilin-deficient mice.** (A) qPCR of neurotensin mRNA levels (delta-CT) in SDH L3-L5 of WT and *Sort1*<sup>-/-</sup> mice 6 d post SNI (n = 3, one-way ANOVA with *post hoc* Tukey's test, ns = not significant, means ± SEM). (B) MS of neurotensin levels in SDH L3-L5 of WT and *Sort1*<sup>-/-</sup> mice 6 d post SNI (n = 6, one-way ANOVA with *post hoc* Tukey's test, means ± SEM). (C) NTSR2 protein levels (by WB) in SDH L3-L5 of WT and *Sort1*<sup>-/-</sup> mice (n = 3, one-way ANOVA with *post hoc* Tukey's test, means ± SEM).

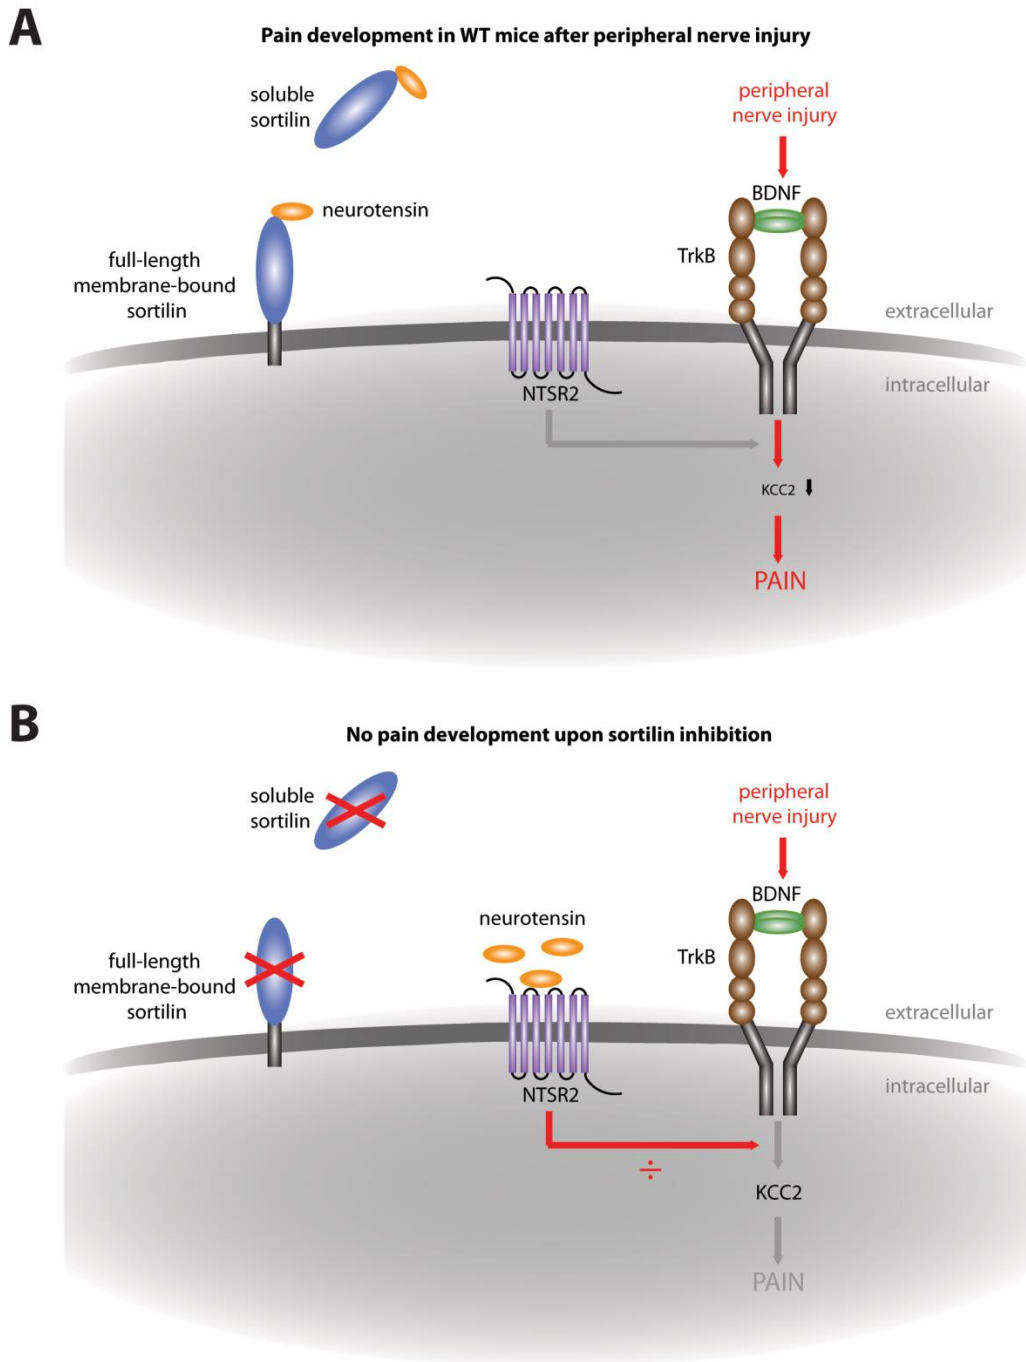

**Fig. S6. Sortilin allows direct manipulation of the pain response to neuronal injury.** (A) Upon neuronal injury, released BDNF activates the central BDNF-TrkB pain inducing pathway leading to KCC2 downregulation. In WT mice, sortilin (possibly both membrane-bound and soluble forms) scavenges neurotensin thereby preventing neurotensin from activating NTSR2, permitting the BDNF-TrkB pain pathway to induce KCC2 downregulation and neuropathic pain (red arrows). (B) In absence of or upon inhibition of sortilin (by antibodies or the small-molecule AF38469), neurotensin activates NTSR2, which inhibits BDNF-TrkB pathway induced KCC2 downregulation and pain development (red arrow). I.t. injection of soluble sortilin to injured *Sort1*<sup>-/-</sup> mice (not shown) restores the neurotensin scavenging capacity allowing pain development.

**A**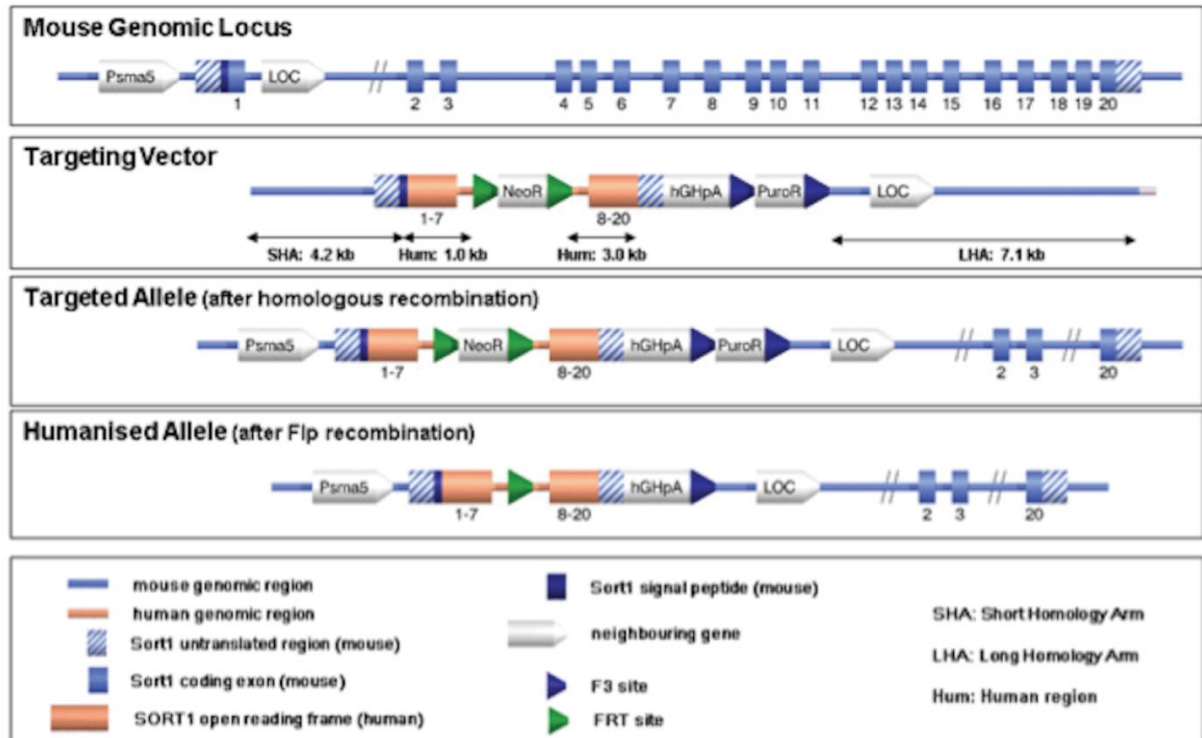**B**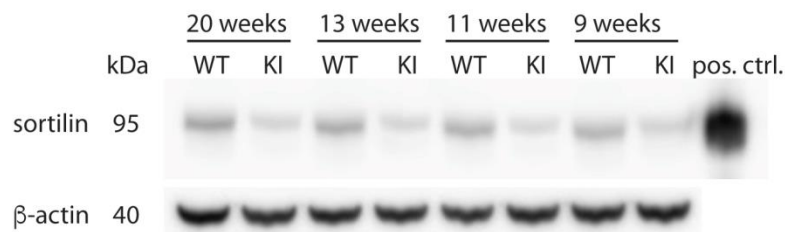

**Fig. S7. *Hum-sortilin-KI* mouse model.** C57BL/6J mice expressing the human *SORT1* gene under the control of the endogenous mouse *Sort1* promoter (*hum-sortilin-KI*). (A) The coding region in mouse exon 1 was replaced with a human *SORT1* cDNA, see Methods section for details. (B) Protein expression was confirmed by Western blotting of nerve tissue
